# Supplementary material for: Analysis of volatile organic compounds in Korean-bred strawberries: insights for improving fruit flavor
Source: Front Plant Sci. 2024 Mar 18;15:1360050. doi: 10.3389/fpls.2024.1360050 (PMC10982345; doi:10.3389/fpls.2024.1360050)
Supplement: Supplementary Table 1 — Information About 122 VOCs Compounds Analyzed and results of the heritability analysis of all detected VOC concentrations [file Table_1.xlsx]

## Sheet:  Supplementary Table 1
* Supplementary Table 1. Information About 122 VOCs Compounds Analyzed									*Results of the heritability analysis of all detected VOC concentrations
Compound Name	Synonyms	Compound class	RT	Riexp	CAS#	Formula	KVC	Identification	SS Treatment	SS Total	P Value	Heritability (Omega Squared ω²)
Methyl isovalerate		Esters	4.065	771.247	556-24-1	C6H12O2	-	NIST,Std	238.961	294.11	4.06107e-24	0.719164		* Compounds with ω² > 0.4 by class
Methyl Isobutyl Ketone		Ketones	3.203	730.81	108-10-1	C6H12O	-	NIST,Std	31.3042	38.5762	5.41939e-24	0.717674		Category	Percentage	value
Hexanoic acid, methyl ester	Methyl capronate; Methyl hexanoate	Esters	8.2135	923.25	106-70-7	C7H14O2	V	NIST,Std	312.044	387.621	3.38156e-23	0.708002		Lactones	0.5	2/4
Linalool		Terpenes	13.216	1098.27	78-70-6	C10H18O	V	NIST,Std	16.9253	21.0548	4.65406e-23	0.706276		Esters	0.477273	21/44
2-Nonanol, acetate		Esters	16.724	1231.93	14936-66-4	C11H22O2	-	NIST	0.00280212	0.00348788	5.31119e-23	0.705559		Aldehydes	0.333333	4/12
Isopropyl acetate		Esters	2.066	649.659	108-21-4	C5H10O2	-	NIST	11.6512	14.5929	2.04437e-22	0.698123		Ketones	0.3	3/10
Methyl propionate		Esters	1.7985	621.722	554-12-1	C4H8O2	-	NIST	3.02864	3.93559	2.52774e-19	0.654979		Hydrocarbons (Cyclic)	0.25	1/4
1-Penten-3-one		Ketones	2.326	676.535	1629-58-9	C5H8O	-	NIST	0.967629	1.27133	1.65925e-18	0.642371		Others	0.25	3/12
Butanal, 3-methyl-		Aldehydes	2.0255	645.471	590-86-3	C5H10O	-	NIST	15.253	20.0608	1.964e-18	0.641214		Terpenes	0.2	1/5
Acetic acid, butyl ester	Butyl acetate	Esters	5.0645	814.27	123-86-4	C6H12O2	V	NIST	51.5836	68.7583	1.67707e-17	0.626089		Alkanes	0.111111	2/18
Butanoic acid, hexyl ester		Esters	15.668	1190.36	2639-63-6	C10H20O2	-	NIST	0.957331	1.27972	2.60249e-17	0.622894		Alcohols	0.1	1/10
1-Butanol, 3-methyl-, acetate	Isoamyl acetate	Esters	6.8035	875.54	123-92-2	C7H14O2	-	NIST	48.3202	64.9606	6.13189e-17	0.616563		Hydrocarbons (Aromatic)	0	0/3
2(3H)-Furanone, 5-hexyldihydro-	gamma-Decalactone	Lactones	22.17	1462	706-14-9	C10H18O2	V	NIST,Std	0.162407	0.224799	3.5803e-15	0.584624
Isopropyl butyrate		Esters	5.811	890.331	638-11-9	C7H14O2	-	NIST	65.2382	91.7175	2.55474e-14	0.567965
Acetic acid, phenylmethyl ester		Esters	14.8735	1160.38	140-11-4	C9H10O2	-	NIST	0.0194004	0.0276673	1.38863e-13	0.552899
Butanoic acid, octyl ester		Esters	20.463	1386.4	110-39-4	C12H24O2	-	NIST	0.114405	0.163474	1.73701e-13	0.550855
2-Buten-1-ol, 3-methyl-, acetate		Esters	8.0925	920.97	1191-16-8	C7H12O2	-	NIST	0.079052	0.113565	3.17809e-13	0.545274
3-Pentanone		Ketones	2.473	691.774	96-22-0	C5H10O	-	NIST	0.832923	1.19796	3.61881e-13	0.544062
3(2H)-Furanone, 4-methoxy-2,5-dimethyl-	Mesifurane	Lactones	11.9951	1055.43	4077-47-8	C7H10O3	V	NIST,Std	0.617893	0.889235	3.87143e-13	0.543431
Butanoic acid, 3-methyl-, octyl ester		Esters	21.5835	1436.08	7786-58-5	C13H26O2	-	NIST	0.0154986	0.0226669	2.17742e-12	0.526854
S-Methyl 3-methylbutanethioate	Methylthiol isovalerate, S-methyl isovalerate	Others	8.621	937.86	23747-45-7	C6H12OS	-	NIST	0.940825	1.38638	4.70163e-12	0.519197
Butanoic acid, butyl ester		Esters	10.3275	997.696	109-21-7	C8H16O2	V	NIST	63.4311	94.1917	1.00727e-11	0.511446
Acetic acid, octyl ester	Octyl acetate	Esters	16.1445	1208.77	112-14-1;	C10H20O2	-	NIST,Std	0.545954	0.817516	2.24825e-11	0.503085
Butanoic acid, 2-methyl-, ethyl ester	Ethyl 2-methylbutyrate	Esters	6.005	847.35	7452-79-1	C7H14O2	-	NIST,Std	28.9519	43.5468	3.41592e-11	0.498647
1-Butanol, 3-methyl-	Isoamyl alcohol	Alcohols	6.783	728.67	123-51-3	C5H12O	-	NIST,Std	0.045751	0.0691678	5.47175e-11	0.49358
2-Pentenal, (E)-		Aldehydes	3.5375	746.48	1576-87-0	C5H8O	-	NIST	0.107472	0.16397	1.23922e-10	0.484609
3-Hexen-1-ol, acetate, (Z)-		Esters	10.59	1004.8	3681-71-8	C8H14O2	V	NIST	0.123918	0.190857	2.80336e-10	0.475414
Cyclotetradecane		Hydrocarbons (Cyclic)	29.2675	1877.37	295-17-0	C14H28	-	NIST	0.660174	1.02911	7.61075e-10	0.463827
Methylazoxymethanol acetate		Esters	2.5065	696.29	592-62-1	C5H9NO3	-	NIST	7.52379	11.7958	1.20481e-09	0.458366
Pentanal		Aldehydes	2.0195	645.35	110-62-3	C5H10O	-	NIST	1.32734	2.13735	9.08019e-09	0.433296
2,6-Dimethoxybenzonitrile		Others	29.486	1895.72	16932-49-3	C9H9NO2	-	NIST	0.307361	0.498579	1.53067e-08	0.426513
Acetic acid, pentyl ester	Pentyl acetate	Esters	7.881	913.19	628-63-7	C7H14O2	-	NIST,Std	0.078395	0.127893	2.2723e-08	0.421293
Undecane, 5-methyl-	Methylundecane	Alkanes	19.623	1350.76	124-12-9	C12H26	-	NIST	0.0375541	0.0613825	2.58844e-08	0.419554
2-Hexenal, (E)-	Trans-2-Hexenal	Aldehydes	6.163	853.82	6728-26-3	C6H10O	V	NIST	2095.09	3436.04	3.25483e-08	0.416476
Propanoic acid, 2-methyl-, ethyl ester	Ethyl isobutyrate	Esters	3.6317	751.72	97-62-1	C6H12O2	-	NIST,Std	3.06651	5.03886	3.70182e-08	0.414735
Dodecane		Alkanes	15.894	1198.9	112-40-3	C12H26	-	NIST,Std	26.5138	43.5803	3.77602e-08	0.414466
Methyl tiglate		Esters	6.4045	862.14	6622-76-0	C6H10O2	-	NIST	0.00128037	0.00212691	7.55531e-08	0.404924
Octanenitrile		Others	18.705	1311.72	124-12-9	C8H15N	-	NIST	0.0514928	0.0858895	9.81784e-08	0.401251
Hexanal		Aldehydes	4.6765	801.49	66-25-1	C6H12O	-	NIST,Std	886.479	1488.2	1.47054e-07	0.39551
2-Penten-1-ol, acetate, (Z)-		Esters	7.7695	910.02	42125-10-0	C7H12O2	-	NIST	0.00178785	0.00303819	3.07804e-07	0.384762
Butanoic acid, ethyl ester	Ethyl butanoate	Esters	8.2665	802.16	105-54-4	C6H12O2	V	NIST,Std	728.485	1247.97	4.93028e-07	0.377729
1-Butanol, 2-methyl-, acetate		Esters	6.8535	877.48	624-41-9	C7H14O2	-	NIST	0.888417	1.52683	5.92369e-07	0.37495
Acetic acid, hexyl ester	Hexyl acetate	Esters	10.791	1012.8	142-92-7	C8H16O2	V	NIST	30.1616	51.8804	6.22306e-07	0.374199
Butanoic acid, methyl ester	Methyl butanoate	Esters	2.892	716.47	623-42-7	C5H10O2	V	NIST,Std	386.319	668.671	7.32457e-07	0.368761
.beta.-Myrcene		Terpenes	10.0465	987.23	123-35-3	C10H16	-	NIST	0.000619016	0.00109131	2.37922e-06	0.353133
Butanoic acid, 3-methylbutyl ester		Esters	12.0245	1056.11	106-27-4	C9H18O2	-	NIST	1.09733	1.97279	6.37818e-06	0.336764
n-Propyl acetate		Esters	2.7385	709.33	109-60-4	C5H10O2	-	NIST	1.76634	3.17894	6.71962e-06	0.335876
Nerolidol		Terpenes	24.214	1557.33	7212-44-4	C15H26O	V	NIST,Std	0.432714	0.785796	1.03196e-05	0.328477
Cyclododecane		Hydrocarbons (Cyclic)	25.099	1236.18	294-62-2	C12H24	-	NIST	0.47383	0.861895	1.11568e-05	0.327114
2,3-Butanedione		Ketones	1.558	590.319	431-03-8	C4H6O2	-	NIST	3.78661	6.9205	1.3894e-05	0.323249
1-Hexanol		Alcohols	6.6075	868.464	111-27-3	C6H14O	-	NIST,Std	16.587	31.2987	5.57794e-05	0.297641
4-Oxohex-2-enal		Aldehydes	9.2995	961.148	2492-43-5	C6H8O2	-	NIST	0.0884298	0.166891	5.61707e-05	0.297507
1-Pentanol		Alcohols	3.8515	762.045	71-41-0	C5H12O	-	NIST	0.0105125	0.019847	5.70102e-05	0.297222
Isobutyl acetate		Esters	3.9805	768.27	110-19-0	C6H12O2	-	NIST	0.0691609	0.135665	0.000248085	0.26763
2-Hexen-1-ol, (E)-	Trans-2-hexenol	Alcohols	6.4825	864.25	928-95-0	C6H12O	-	NIST	11.8006	23.389	0.000357529	0.25981
Butanoic acid, 3-methyl-, ethyl ester	Ethyl isovalerate	Esters	6.197	852.32	108-64-5	C7H14O2	-	NIST,Std	466.282	933.216	0.000497911	0.252541
Acetic acid, decyl ester		Esters	20.533	1389.39	112-17-4	C12H24O2		NIST	0.0081334	0.0163816	0.000613954	0.247849
Disulfide, dimethyl		Others	3.263	733.66	624-92-0	C2H6S2	-	NIST	8.59333	17.4379	0.000781683	0.242343
Butanoic acid, 2-methyl-, methyl ester		Esters	4.02	770.15	868-57-5	C6H12O2	-	NIST	0.843356	1.73315	0.00115892	0.233134
Hexadecane		Alkanes	20.728	1397.63	544-76-3	C16H34	-	NIST	6.06484	12.8808	0.002983	0.209692
Benzenemethanol, .alpha.,.alpha.-dimethyl-		Alcohols	12.79	1083.26	617-94-7	C9H12O	-	NIST	0.0936758	0.200281	0.00356273	0.205052
Oxirane, 2,3-dimethyl-, cis-	cis-2-Butene epoxide; cis-2-Butene oxide; cis-2-Butylene oxide; cis-2,3-Epoxybutane	Others	2.4945	695.03	1758-33-4	C4H8O	-	NIST	0.209962	0.453707	0.00469284	0.197687
Propanoic acid, ethyl ester	Ethyl propionate	Esters	2.7075	707.29	105-37-3	C5H10O2	-	NIST,Std	6.84355	14.9429	0.00608006	0.190565
2-Hexen-1-ol, acetate	2-Hexenyl acetate	Esters	10.853	1015.16	2497-18-9	C8H14O2	-	NIST	23.7154	51.8789	0.00636104	0.189302
Undecane		Alkanes	27.8975	1768.42	1120-21-4	C11H24	-	NIST	6.52379e-05	0.000147923	0.0143487	0.165364
1,3-Hexadiene		Alkanes	1.75402	617.58	592-48-3	C6H10	-	NIST	0.00639978	0.0145181	0.0144961	0.165048
Heptanal		Aldehydes	7.48309	900.31	111-71-7	C7H14O	-	NIST	0.0125986	0.0289371	0.0187255	0.156971
Hexanoic acid, ethyl ester	Ethyl hexanoate	Esters	10.5025	999.39	123-66-0	C8H16O2	V	NIST,Std	433.448	1006.63	0.0232887	0.149855
.gamma.-Dodecalactone		Lactones	26.468	1674.78	148051	C12H22O2	-	NIST,Std	0.00103787	0.00247349	0.0374279	0.133516
Ethyl Acetate		Esters	1.6705	608.53	141-78-6	C4H8O2	-	NIST	5.30781	12.8656	0.0497515	0.123059
Bicyclo[4.2.0]octa-1,3,5-triene		Hydrocarbons (Cyclic)	7.092	885.999	694-87-1	C8H8	-	NIST	0.411082	1.01202	0.0635306	0.113612
Benzoic acid		Others	14.7675	1156.58	65-85-0	C7H6O2	-	NIST	0.0137841	0.0347657	0.090201	0.0991828
1-Hexanol, 2-ethyl-		Alcohols	11.2325	1028.07	104-76-7	C8H18O	-	NIST	1.5007	3.8047	0.0967876	0.0961368
3-Hexenal, (Z)-		Aldehydes	6.05162	849.65	6789-80-6	C6H10O	V	NIST	826.625	2102.1	0.10079	0.0943614
Phenylmaleic anhydride		Others	23.539	1525.44	36122-35-7	C9H6O3	-	NIST	0.0112396	0.0285909	0.101203	0.0941811
Pentane		Alkanes	1.24925	501.97	109-66-0	C5H12	-	NIST	1.52436	3.9239	0.117941	0.0872967
1-Butanol, 2-nitro-		Alcohols	9.446	966.87	609-31-4	C4H9NO3	-	NIST	9.65791e-05	0.000248831	0.11928	0.0867775
Tetradecane		Alkanes	25.0345	1422.47	629-59-4	C14H30	-	NIST	4.73784	12.628	0.176815	0.0675526
2,3-Butanediol		Alcohols	2.1825	-	513-85-9	C4H10O2	-	NIST	0.0739155	0.19935	0.199964	0.0610177
Hexanoic acid		Others	10.548	992.982	142-62-1	C6H12O2	-	NIST	0.417312	1.13335	0.214335	0.0571988
Phthalic anhydride		Others	18.5175	1304.8	85-44-9	C8H4O3	-	NIST	0.00218323	0.00599016	0.23633	0.0516436
Benzaldehyde		Aldehydes	9.1955	958.082	100-52-7	C7H6O	-	NIST	0.266568	0.734347	0.245306	0.0494638
Octane, 4-methyl-		Alkanes	5.1655	817.694	2216-34-4	C9H20	-	NIST	0.00929332	0.0267613	0.352583	0.0261107
Toluene		Hydrocarbons (Aromatic)	3.738	756.489	108-88-3	C7H8	-	NIST,Std	0.518759	1.52044	0.39855	0.0170915
Nonanal		Aldehydes	13.353	1103.33	124-19-6	C9H18O	-	NIST	1.99811	5.91651	0.425616	0.0119409
Hexane, 2,4-dimethyl-		Alkanes	3.8972	764.32	589-43-5	C8H18	-	NIST	0.00705085	0.0209278	0.431962	0.0107464
2-Hexen-1-ol, acetate, (E)-	Trans-2-Hexenyl acetate	Esters	10.8605	1014.67	2497-18-9	C8H14O2	V	NIST	25.8477	77.1444	0.44668	0.00799175
1-Penten-3-ol		Alcohols	12.152	1060.97	616-25-1	C5H10O	-	NIST	0.0109378	0.0328272	0.461557	0.00522625
Octane, 3,3-dimethyl-		Alkanes	12.113	1059.59	4110-44-5	C10H22	-	NIST	0.0659923	0.19862	0.469087	0.00383272
Decane, 4-methyl-		Alkanes	11.947	1053.6	2847-72-5	C11H24	-	NIST	0.223186	0.674125	0.478561	0.0020839
2-Hexenal		Aldehydes	6.1095	852.02	6728-26-3	C6H10O	-	NIST	46.4465	140.324	0.479203	0.0019656
Ethanedione, diphenyl-		Ketones	12.9915	1090.57	134-81-6	C14H10O2	-	NIST	0.133009	0.40195	0.479895	0.00183813
1,3,5,7-Cyclooctatetraene		Hydrocarbons (Cyclic)	7.093	886.51	629-20-9	C8H8	-	NIST	0.00103083	0.00311638	0.480956	0.00164265
D-Limonene		Terpenes	11.1835	1026.54	5989-27-5	C10H16	-	NIST	0.31413	0.9513	0.485515	0.00080313
Pentanoic acid, 4-methyl-, methyl ester	Methyl 4-methylpentanoate	Esters	7.199	889.68	2412-80-8	C7H14O2	-	NIST	0.383242	1.16162	0.487857	0.000372282
3-Heptanone, 4-methyl-		Ketones	2.3215	-	1547845	C8H16O		NIST	0.000691445	0.00209738	0.489881	5.44953e-15
1-Propanone, 1-cyclohexyl-		Ketones	11.279	-	1123-86-0	C9H16O		NIST	2.7241e-05	8.26312e-05	0.489881	-1.22337e-16
Limonene oxide, trans-		Terpenes	14.057	1129.93	42477-94-1	C10H16O	-	NIST	6.71097e-05	0.000203566	0.489881	-2.2512e-15
4-Hexen-1-ol, acetate		Esters	10.526	1003.63	72237-36-6	C8H14O2		NIST	7.14441e-05	0.000216714	0.489881	-2.92316e-15
Heptane, 2,5-dimethyl-		Alkanes	2.3285	608.53	2216-30-0	C9H20		NIST	0.000245684	0.000745243	0.489881	-6.94503e-15
3(2H)-Furanone, dihydro-2-methyl-		Lactones	4.7905	805.01	3188-00-9	C5H8O2		NIST	1.25865e-05	3.8209e-05	0.491963	-0.000382571
Benzophenone		Ketones	25.6245	1628.45	119-61-9	C13H10O	-	NIST	2.97328	9.03282	0.493965	-0.000750497
Hexane, 3-methyl-		Alkanes	2.19217	663.41	589-34-4	C7H16	-	NIST	0.0259803	0.0790612	0.498443	-0.00157302
Heptane, 2,4-dimethyl-		Alkanes	6.357	859.62	2213-23-2	C9H20	-	NIST	0.234125	0.71406	0.504358	-0.00265851
Ethylbenzene		Hydrocarbons (Aromatic)	6.2605	855.929	100-41-4	C8H10	-	NIST	2.62617	8.03242	0.511898	-0.00404132
Styrene		Hydrocarbons (Aromatic)	7.054	885.13	100-42-5	C8H8	-	NIST	0.000317975	0.000972747	0.512405	-0.00413443
5-Hepten-2-one, 6-methyl-		Ketones	8.9235	949.15	110-93-0	C8H14O		NIST	0.00231151	0.00707198	0.512636	-0.00417679
2-Butanol, 3-methyl-, acetate		Esters	5.956	846.27	5343-96-4	C7H14O2	-	NIST	9.15717e-06	2.80486e-05	0.515716	-0.00474129
Methyl anthranilate		Esters	19.309	1337.44	134-20-3	C8H9NO2	V	NIST,std	1.41179e-07	4.33037e-07	0.519382	-0.00541334
Vanillin		Aldehydes	20.5435	-	121-33-5	C8H8O3		NIST,Std	0.000247896	0.000760641	0.520336	-0.00558824
Butanoic acid, 2-methyl-, 1-methylethyl ester		Esters	7.279	-	66576-71-4	C8H16O2		NIST	0.00155185	0.00476416	0.52171	-0.0058401
Acetophenone		Ketones	12.1965	1062.24	98-86-2	C8H8O	-	NIST	1.0751	3.30139	0.522396	-0.00596592
Octane, 6-ethyl-2-methyl-		Alkanes	12.636	-	62016-19-7	C12H26	-	NIST	0.0935583	0.288278	0.531358	-0.00760885
Ether, 6-methylheptyl vinyl		Others	2.321	676.88	10573-35-0	C10H20O		NIST	0.00431804	0.0133544	0.541059	-0.00938848
1-Butanol, 2-methyl-		Alcohols	3.318	736.83	137-32-6	C5H12O	-	NIST	7.21174e-06	2.23736e-05	0.549219	-0.010887
Ethyl nicotinate		Esters	16.2075	1211.29	614-18-6	C8H9NO2		NIST	3.3142e-06	1.02842e-05	0.549788	-0.0109914
Propane, 1,1'-sulfonylbis-	Propyl sulfone	Others	2.4854	694.08	10495-45-1	C3H8O2S	-	NIST	0.0413108	0.128452	0.555083	-0.011965
n-Hexane		Alkanes	1.595	600.94	110-54-3	C6H14	-	NIST,Std	11.5508	35.9204	0.555398	-0.012023
Benzyl isopentyl ether		Others	3.72	755.91	122-73-6	C12H18O		NIST	8.03407e-05	0.000251092	0.568291	-0.0143987
Decane		Alkanes	10.3711	998.24	124-18-5	C10H22	-	NIST	0.841339	2.63129	0.570068	-0.0147268
Octane, 2,3,7-trimethyl-		Alkanes	11.831	1049.41	62016-34-6	C11H24	-	NIST	0.066767	0.210156	0.58642	-0.0177553
Acetic acid, nonyl ester		Esters	18.6085	1307.7	143-13-5	C11H22O2	-	NIST	0.00425424	0.0138098	0.661693	-0.0320567
								*NIST= NIST library
